# Supplementary material
Source: publisher figshare collection journal article supplement (https://gsapubs.figshare.com/articles/dataset/_/12540299)
Supplement: Supplementary file 1 [file 1]

Liu, S., Li, J., Stockli, D.F., Song, C., Guo, B., Stockli, L.D., Ma, Z., Li, X., and Peng, T., 2018, Reappraisal of Miocene eolian deposition in Tianshui Basin, China, based on an investigation of stratigraphy and provenance: GSA Bulletin, <https://doi.org/10.1130/B32056.1>.

## **Data Repository**

Data Table DR1: Heavy mineral results of this study

Data Table DR2: Detrital zircon isotopes and ages of this study

Data Table DR3: Zircon age components determined by the BayesMix

Data Table DR4: Igneous rock ages and references

Figure DR1: Petrography and photographs showing detailed observation of sedimentary structures on the Qin'an and Yawan sections

Figure DR2: Individual plots for samples from rivers and mountain belts

Figure DR3: Individual plots for samples from deserts

Figure DR4: Individual plots for samples from loess/Red Clay sequences

Figure DR5: Individual plots for samples from inland basins

Table DR1: P values of Kolmogorov–Smirnov (K-S) test for zircon ages

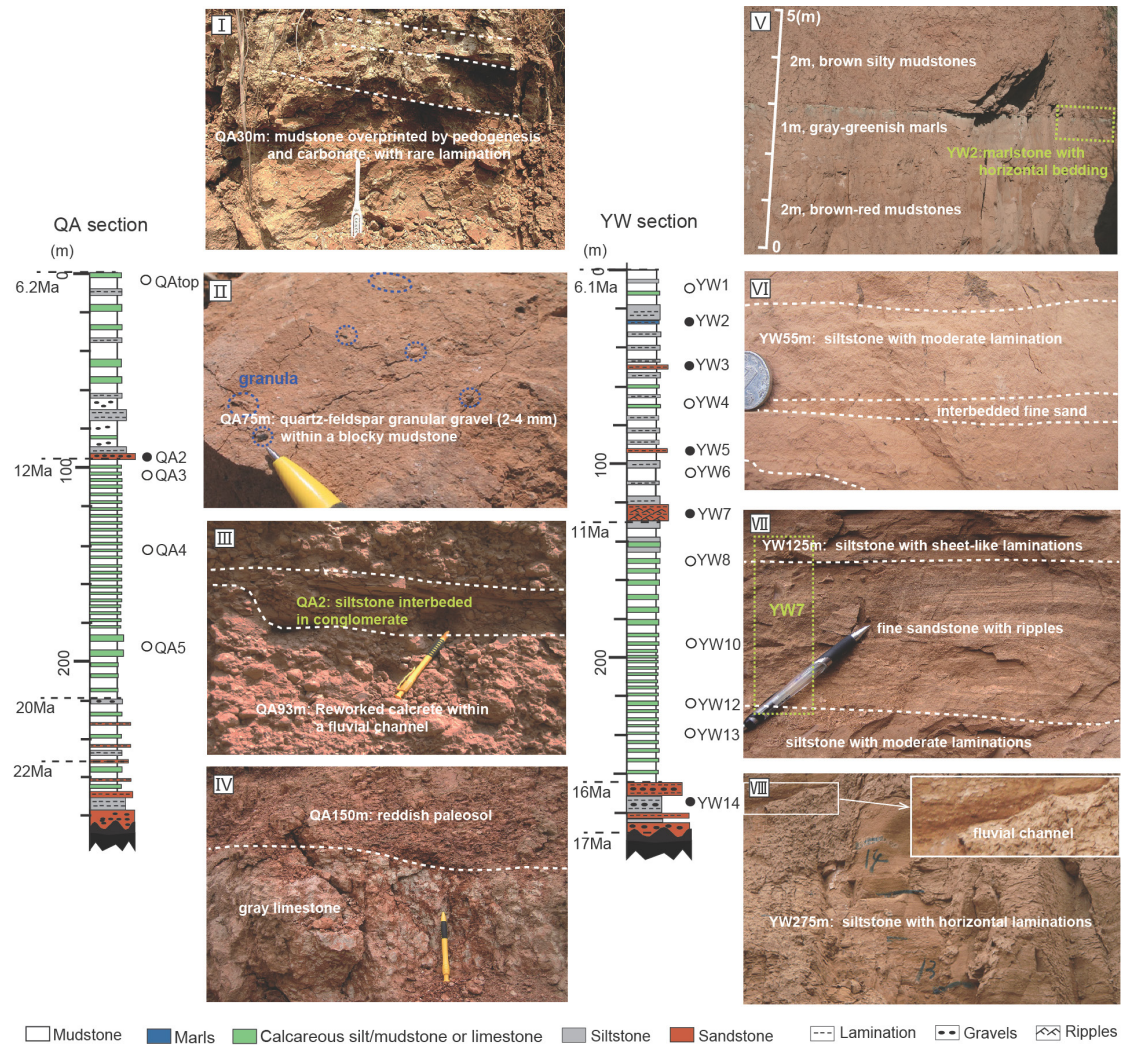

**Figure DR1: Petrography and photographs showing detailed observation of sedimentary structures on the Qin'an and Yawan sections**

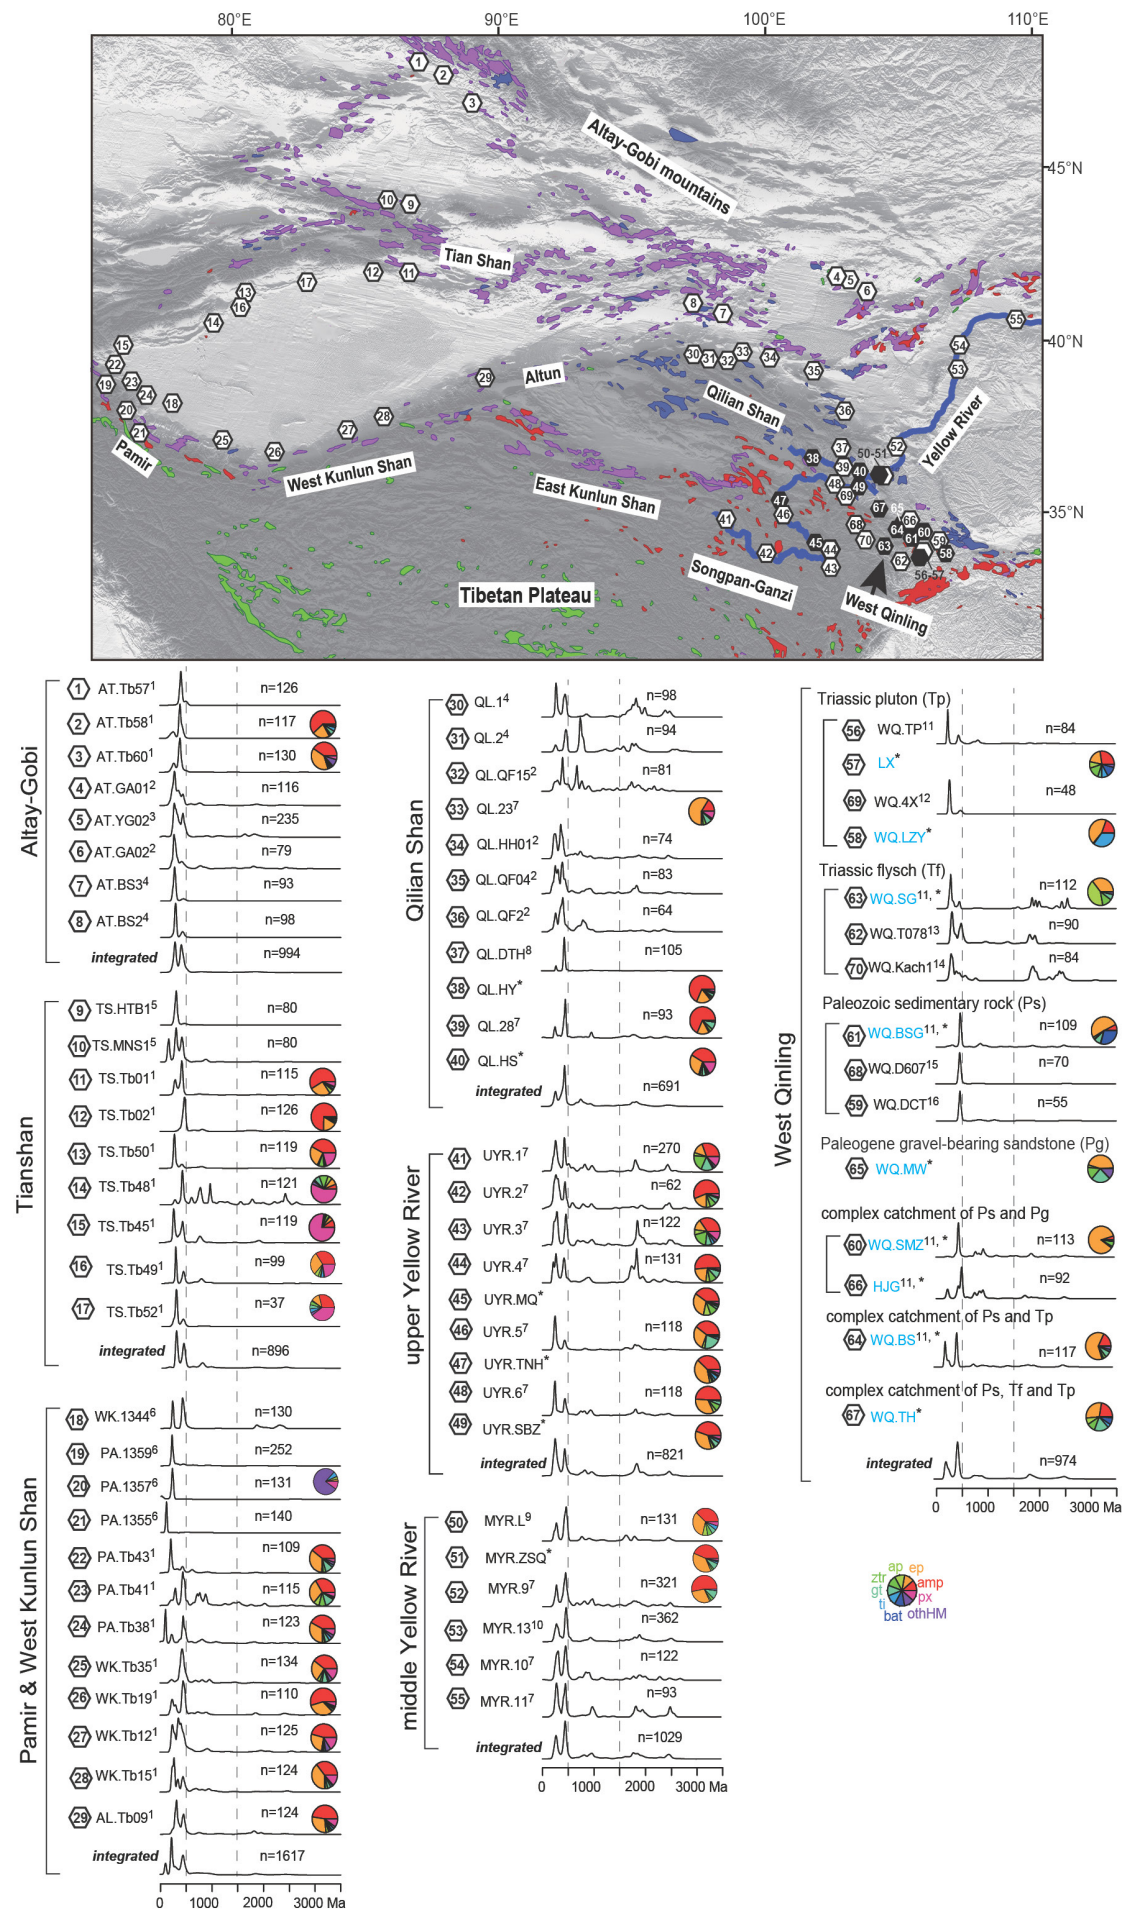

---

**Figure DR2: Individual plots for samples from rivers and mountain belts.**

Superscripts are references that 1 for Rittner et al., 2016; 2 for Zhang et al., 2016b; 3 for Che and Li, 2013; 4 for Wang et al., 2016b; 5 for Ren et al., 2017; 6 for Blayney et al., 2016; 7 for Nie et al., 2015; 8 for Guo et al., 2018; 9 for Stevens et al., 2013; 10 for Licht et al., 2016; 11 for Liu et al., 2015; 12 for Lease et al., 2007, 2012; 13 for Ding et al., 2013; 14 for Weislogel et al., 2010; 15 for Zhang et al., 2014b; 16 for Wu et al., 2012; \* for this paper.



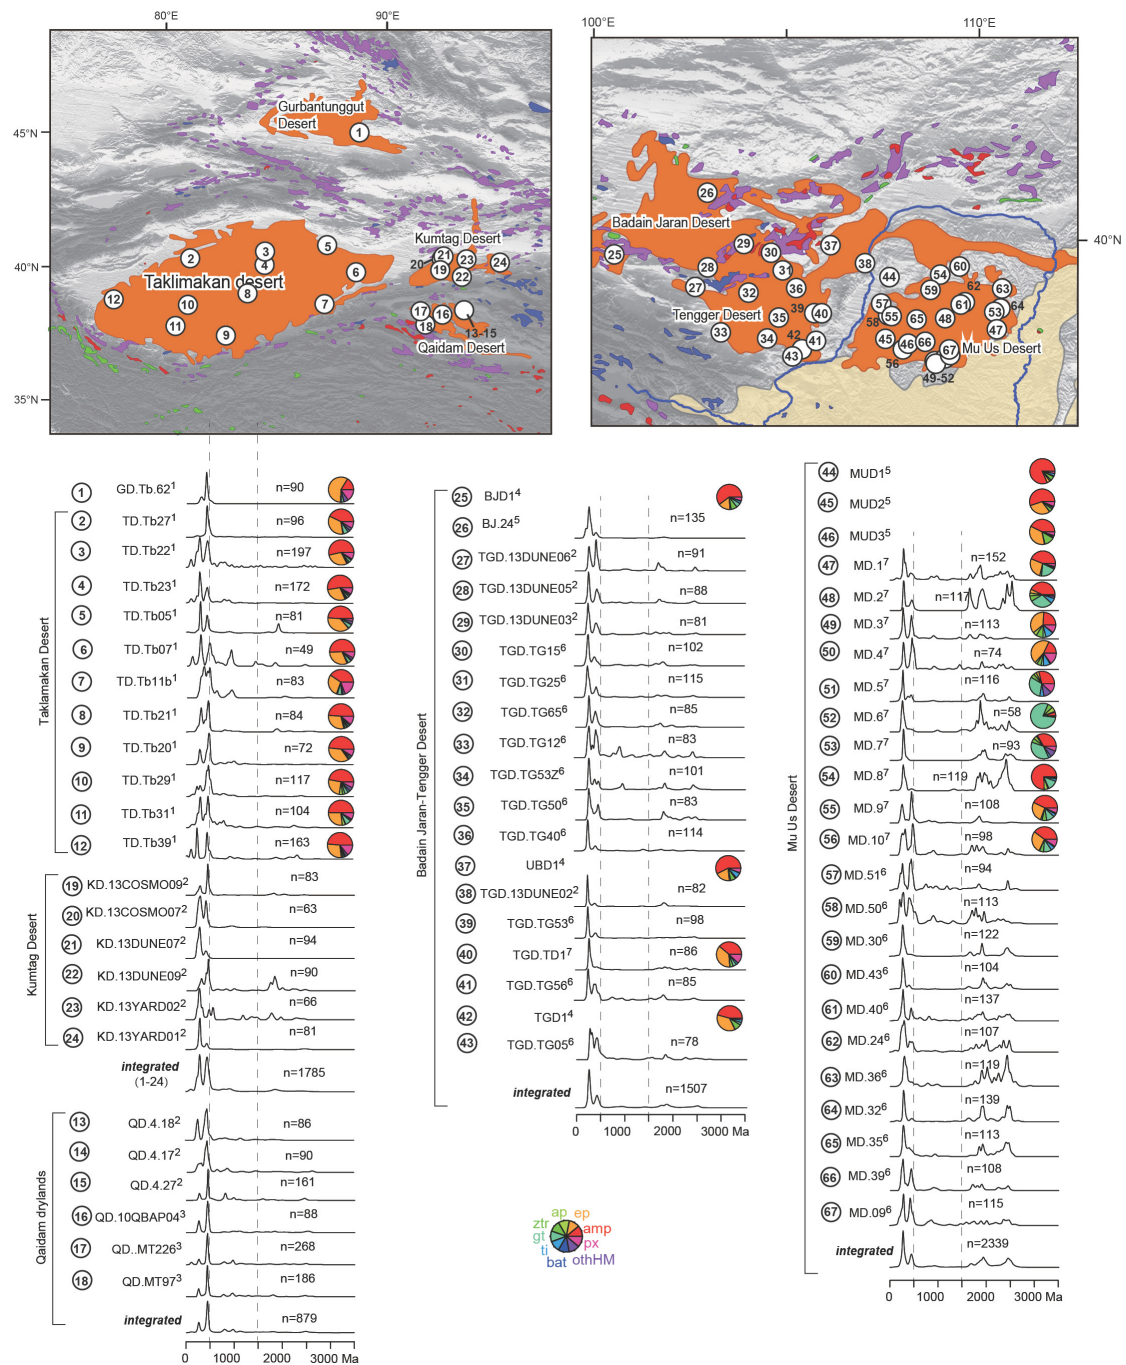

**Figure DR3: Individual plots for samples from loess/Red Clay sequences.**

Superscripts are references that 1 for Rittner et al., 2016; 2 for Licht et al., 2016; 3 for Pollen et al., 2011; 4 for Nie et al., 2014; 5 for Nie et al., 2015; 6 for Zhang et al., 2016b; 7 for Stevens et al., 2013.

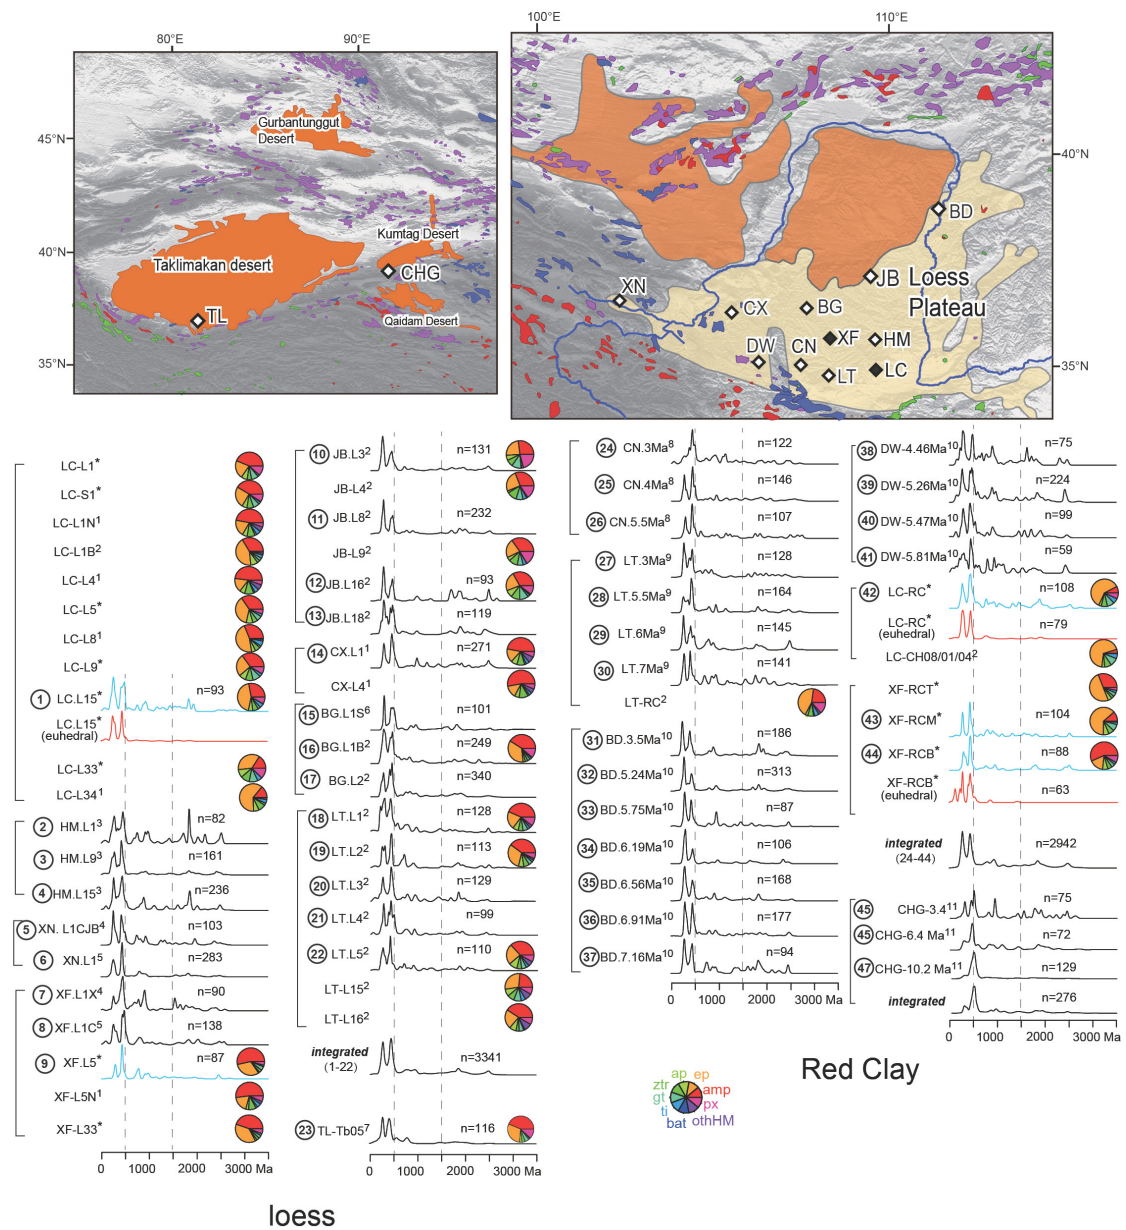

**Figure DR4: Individual samples cited from loess/Red Clay sequences.**

Superscripts are references that 1 for Nie et al., 2014; 2 for Bird et al., 2015; 3 for Pollen et al., 2011; 4 for Xiao et al., 2012; 5 for Xiao et al., 2013; 6 for Stevens et al., 2013; 7 for Rittner et al., 2016; 8 for Nie et al., 2015; 9 for Gong et al., 2016; 10 for Shang et al., 2016; 11 for Pan et al., 2016; \* for this paper.

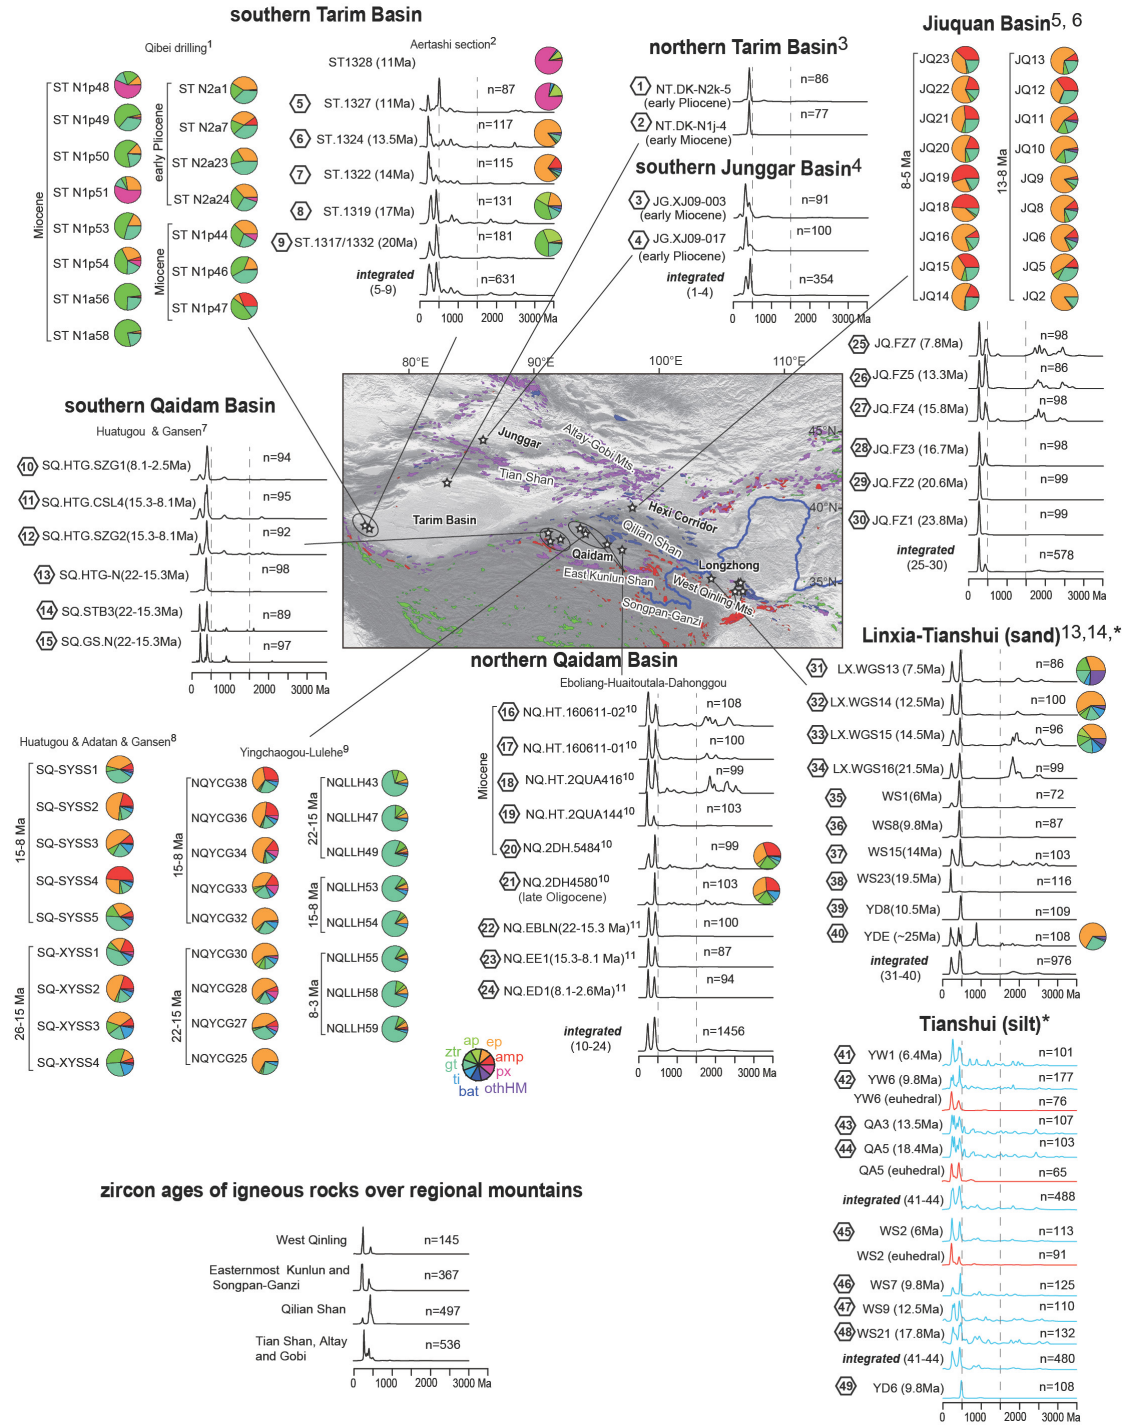

**Figure DR5: Individual plots for samples from inland basins.** Superscripts are references that 1 for Lei et al., 2011; 2 for Blayney et al., 2016; 3 for Li et al., 2010; 4 for Yang et al., 2013; 5 for Song et al., 2002; 6 for Wang et al., 2016b; 7 for Cheng et al., 2016a; 8 for Li et al., 2015; 9 for Jian et al., 2013; 10 for Bush et al., 2015; 11 for Cheng et al., 2016b; 12 for Lease et al., 2007, 2012; 13 for

---

Wang et al., 2016; \* for this paper.



Table DR1: P values of Kolmogorov–Smirnov test using the Excel macro from Guynn and Gehrels (2010)

Miocene basin sediments

|  | YV1 | YW2 | QA3 | QA5 | WS2 | WS7 | WS9 | WS21 | WS1 | WS8 | WS15 | WS23 | YD6 | YD8 | YDE | LT-13 | LT-14 | LT-15 | LT-16 | LT-17 | LT-18 | LT-19 | LT-20 | LT-21 | LT-22 | LT-23 | LT-24 | LT-25 | LT-26 | LT-27 | LT-28 | LT-29 | LT-30 | LT-31 | LT-32 | LT-33 | LT-34 | LT-35 | LT-36 | LT-37 | LT-38 | LT-39 | LT-40 | LT-41 | LT-42 | LT-43 | LT-44 | LT-45 | LT-46 | LT-47 | LT-48 | LT-49 | LT-50 | LT-51 | LT-52 | LT-53 | LT-54 | LT-55 | LT-56 | LT-57 | LT-58 | LT-59 | LT-60 | LT-61 | LT-62 | LT-63 | LT-64 | LT-65 | LT-66 | LT-67 | LT-68 | LT-69 | LT-70 | LT-71 | LT-72 | LT-73 | LT-74 | LT-75 | LT-76 | LT-77 | LT-78 | LT-79 | LT-80 | LT-81 | LT-82 | LT-83 | LT-84 | LT-85 | LT-86 | LT-87 | LT-88 | LT-89 | LT-90 | LT-91 | LT-92 | LT-93 | LT-94 | LT-95 | LT-96 | LT-97 | LT-98 | LT-99 | LT-100 | LT-101 | LT-102 | LT-103 | LT-104 | LT-105 | LT-106 | LT-107 | LT-108 | LT-109 | LT-110 | LT-111 | LT-112 | LT-113 | LT-114 | LT-115 | LT-116 | LT-117 | LT-118 | LT-119 | LT-120 | LT-121 | LT-122 | LT-123 | LT-124 | LT-125 | LT-126 | LT-127 | LT-128 | LT-129 | LT-130 | LT-131 | LT-132 | LT-133 | LT-134 | LT-135 | LT-136 | LT-137 | LT-138 | LT-139 | LT-140 | LT-141 | LT-142 | LT-143 | LT-144 | LT-145 | LT-146 | LT-147 | LT-148 | LT-149 | LT-150 | LT-151 | LT-152 | LT-153 | LT-154 | LT-155 | LT-156 | LT-157 | LT-158 | LT-159 | LT-160 | LT-161 | LT-162 | LT-163 | LT-164 | LT-165 | LT-166 | LT-167 | LT-168 | LT-169 | LT-170 | LT-171 | LT-172 | LT-173 | LT-174 | LT-175 | LT-176 | LT-177 | LT-178 | LT-179 | LT-180 | LT-181 | LT-182 | LT-183 | LT-184 | LT-185 | LT-186 | LT-187 | LT-188 | LT-189 | LT-190 | LT-191 | LT-192 | LT-193 | LT-194 | LT-195 | LT-196 | LT-197 | LT-198 | LT-199 | LT-200 | LT-201 | LT-202 | LT-203 | LT-204 | LT-205 | LT-206 | LT-207 | LT-208 | LT-209 | LT-210 | LT-211 | LT-212 | LT-213 | LT-214 | LT-215 | LT-216 | LT-217 | LT-218 | LT-219 | LT-220 | LT-221 | LT-222 | LT-223 | LT-224 | LT-225 | LT-226 | LT-227 | LT-228 | LT-229 | LT-230 | LT-231 | LT-232 | LT-233 | LT-234 | LT-235 | LT-236 | LT-237 | LT-238 | LT-239 | LT-240 | LT-241 | LT-242 | LT-243 | LT-244 | LT-245 | LT-246 | LT-247 | LT-248 | LT-249 | LT-250 | LT-251 | LT-252 | LT-253 | LT-254 | LT-255 | LT-256 | LT-257 | LT-258 | LT-259 | LT-260 | LT-261 | LT-262 | LT-263 | LT-264 | LT-265 | LT-266 | LT-267 | LT-268 | LT-269 | LT-270 | LT-271 | LT-272 | LT-273 | LT-274 | LT-275 | LT-276 | LT-277 | LT-278 | LT-279 | LT-280 | LT-281 | LT-282 | LT-283 | LT-284 | LT-285 | LT-286 | LT-287 | LT-288 | LT-289 | LT-290 | LT-291 | LT-292 | LT-293 | LT-294 | LT-295 | LT-296 | LT-297 | LT-298 | LT-299 | LT-300 | LT-301 | LT-302 | LT-303 | LT-304 | LT-305 | LT-306 | LT-307 | LT-308 | LT-309 | LT-310 | LT-311 | LT-312 | LT-313 | LT-314 | LT-315 | LT-316 | LT-317 | LT-318 | LT-319 | LT-320 | LT-321 | LT-322 | LT-323 | LT-324 | LT-325 | LT-326 | LT-327 | LT-328 | LT-329 | LT-330 | LT-331 | LT-332 | LT-333 | LT-334 | LT-335 | LT-336 | LT-337 | LT-338 | LT-339 | LT-340 | LT-341 | LT-342 | LT-343 | LT-344 | LT-345 | LT-346 | LT-347 | LT-348 | LT-349 | LT-350 | LT-351 | LT-352 | LT-353 | LT-354 | LT-355 | LT-356 | LT-357 | LT-358 | LT-359 | LT-360 | LT-361 | LT-362 | LT-363 | LT-364 | LT-365 | LT-366 | LT-367 | LT-368 | LT-369 | LT-370 | LT-371 | LT-372 | LT-373 | LT-374 | LT-375 | LT-376 | LT-377 | LT-378 | LT-379 | LT-380 | LT-381 | LT-382 | LT-383 | LT-384 | LT-385 | LT-386 | LT-387 | LT-388 | LT-389 | LT-390 | LT-391 | LT-392 | LT-393 | LT-394 | LT-395 | LT-396 | LT-397 | LT-398 | LT-399 | LT-400 | LT-401 | LT-402 | LT-403 | LT-404 | LT-405 | LT-406 | LT-407 | LT-408 | LT-409 | LT-410 | LT-411 | LT-412 | LT-413 | LT-414 | LT-415 | LT-416 | LT-417 | LT-418 | LT-419 | LT-420 | LT-421 | LT-422 | LT-423 | LT-424 | LT-425 | LT-426 | LT-427 | LT-428 | LT-429 | LT-430 | LT-431 | LT-432 | LT-433 | LT-434 | LT-435 | LT-436 | LT-437 | LT-438 | LT-439 | LT-440 | LT-441 | LT-442 | LT-443 | LT-444 | LT-445 | LT-446 | LT-447 | LT-448 | LT-449 | LT-450 | LT-451 | LT-452 | LT-453 | LT-454 | LT-455 | LT-456 | LT-457 | LT-458 | LT-459 | LT-460 | LT-461 | LT-462 | LT-463 | LT-464 | LT-465 | LT-466 | LT-467 | LT-468 | LT-469 | LT-470 | LT-471 | LT-472 | LT-473 | LT-474 | LT-475 | LT-476 | LT-477 | LT-478 | LT-479 | LT-480 | LT-481 | LT-482 | LT-483 | LT-484 | LT-485 | LT-486 | LT-487 | LT-488 | LT-489 | LT-490 | LT-491 | LT-492 | LT-493 | LT-494 | LT-495 | LT-496 | LT-497 | LT-498 | LT-499 | LT-500 | LT-501 | LT-502 | LT-503 | LT-504 | LT-505 | LT-506 | LT-507 | LT-508 | LT-509 | LT-510 | LT-511 | LT-512 | LT-513 | LT-514 | LT-515 | LT-516 | LT-517 | LT-518 | LT-519 | LT-520 | LT-521 | LT-522 | LT-523 | LT-524 | LT-525 | LT-526 | LT-527 | LT-528 | LT-529 | LT-530 | LT-531 | LT-532 | LT-533 | LT-534 | LT-535 | LT-536 | LT-537 | LT-538 | LT-539 | LT-540 | LT-541 | LT-542 | LT-543 | LT-544 | LT-545 | LT-546 | LT-547 | LT-548 | LT-549 | LT-550 | LT-551 | LT-552 | LT-553 | LT-554 | LT-555 | LT-556 | LT-557 | LT-558 | LT-559 | LT-560 | LT-561 | LT-562 | LT-563 | LT-564 | LT-565 | LT-566 | LT-567 | LT-568 | LT-569 | LT-570 | LT-571 | LT-572 | LT-573 | LT-574 | LT-575 | LT-576 | LT-577 | LT-578 | LT-579 | LT-580 | LT-581 | LT-582 | LT-583 | LT-584 | LT-585 | LT-586 | LT-587 | LT-588 | LT-589 | LT-590 | LT-591 | LT-592 | LT-593 | LT-594 | LT-595 | LT-596 | LT-597 | LT-598 | LT-599 | LT-600 | LT-601 | LT-602 | LT-603 | LT-604 | LT-605 | LT-606 | LT-607 | LT-608 | LT-609 | LT-610 | LT-611 | LT-612 | LT-613 | LT-614 | LT-615 | LT-616 | LT-617 | LT-618 | LT-619 | LT-620 | LT-621 | LT-622 | LT-623 | LT-624 | LT-625 | LT-626 | LT-627 | LT-628 | LT-629 | LT-630 | LT-631 | LT-632 | LT-633 | LT-634 | LT-635 | LT-636 | LT-637 | LT-638 | LT-639 | LT-640 | LT-641 | LT-642 | LT-643 | LT-644 | LT-645 | LT-646 | LT-647 | LT-648 | LT-649 | LT-650 | LT-651 | LT-652 | LT-653 | LT-654 | LT-655 | LT-656 | LT-657 | LT-658 | LT-659 | LT-660 | LT-661 | LT-662 | LT-663 | LT-664 | LT-665 | LT-666 | LT-667 | LT-668 | LT-669 | LT-670 | LT-671 | LT-672 | LT-673 | LT-674 | LT-675 | LT-676 | LT-677 | LT-678 | LT-679 | LT-680 | LT-681 | LT-682 | LT-683 | LT-684 | LT-685 | LT-686 | LT-687 | LT-688 | LT-689 | LT-690 | LT-691 | LT-692 | LT-693 | LT-694 | LT-695 | LT-696 | LT-697 | LT-698 | LT-699 | LT-700 | LT-701 | LT-702 | LT-703 | LT-704 | LT-705 | LT-706 | LT-707 | LT-708 | LT-709 | LT-710 | LT-711 | LT-712 | LT-713 | LT-714 | LT-715 | LT-716 | LT-717 | LT-718 | LT-719 | LT-720 | LT-721 | LT-722 | LT-723 | LT-724 | LT-725 | LT-726 | LT-727 | LT-728 | LT-729 | LT-730 | LT-731 | LT-732 | LT-733 | LT-734 | LT-735 | LT-736 | LT-737 | LT-738 | LT-739 | LT-740 | LT-741 | LT-742 | LT-743 | LT-744 | LT-745 | LT-746 | LT-747 | LT-748 | LT-749 | LT-750 | LT-751 | LT-752 | LT-753 | LT-754 | LT-755 | LT-756 | LT-757 | LT-758 | LT-759 | LT-760 | LT-761 | LT-762 | LT-763 | LT-764 | LT-765 | LT-766 | LT-767 | LT-768 | LT-769 | LT-770 | LT-771 | LT-772 | LT-773 | LT-774 | LT-775 | LT-776 | LT-777 | LT-778 | LT-779 | LT-780 | LT-781 | LT-782 | LT-783 | LT-784 | LT-785 | LT-786 | LT-787 | LT-788 | LT-789 | LT-790 | LT-791 | LT-792 | LT-793 | LT-794 | LT-795 | LT-796 | LT-797 | LT-798 | LT-799 | LT-800 | LT-801 | LT-802 | LT-803 | LT-804 | LT-805 | LT-806 | LT-807 | LT-808 | LT-809 | LT-810 | LT-811 | LT-812 | LT-813 | LT-814 | LT-815 | LT-816 | LT-817 | LT-818 | LT-819 | LT-820 | LT-821 | LT-822 | LT-823 | LT-824 | LT-825 | LT-826 | LT-827 | LT-828 | LT-829 | LT-830 | LT-831 | LT-832 | LT-833 | LT-834 | LT-835 | LT-836 | LT-837 | LT-838 | LT-839 | LT-840 | LT-841 | LT-842 | LT-843 | LT-844 | LT-845 | LT-846 | LT-847 | LT-848 | LT-849 | LT-850 | LT-851 | LT-852 | LT-853 | LT-854 | LT-855 | LT-856 | LT-857 | LT-858 | LT-859 | LT-860 | LT-861 | LT-862 | LT-863 | LT-864 | LT-865 | LT-866 | LT-867 | LT-868 | LT-869 | LT-870 | LT-871 | LT-872 | LT-873 | LT-874 | LT-875 | LT-876 | LT-877 | LT-878 | LT-879 | LT-880 | LT-881 | LT-882 | LT-883 | LT-884 | LT-885 | LT-886 | LT-887 | LT-888 | LT-889 | LT-890 | LT-891 | LT-892 | LT-893 | LT-894 | LT-895 | LT-896 | LT-897 | LT-898 | LT-899 | LT-900 | LT-901 | LT-902 | LT-903 | LT-904 | LT-905 | LT-906 | LT-907 | LT-908 | LT-909 | LT-910 | LT-911 | LT-912 | LT-913 | LT-914 | LT-915 | LT-916 | LT-917 | LT-918 | LT-919 | LT-920 | LT-921 | LT-922 | LT-923 | LT-924 | LT-925 | LT-926 | LT-927 | LT-928 | LT-929 | LT-930 | LT-931 | LT-932 | LT-933 | LT-934 | LT-935 | LT-936 | LT-937 | LT-938 | LT-939 | LT-940 | LT-941 | LT-942 | LT-943 | LT-944 | LT-945 | LT-946 | LT-947 | LT-948 | LT-949 | LT-950 | LT-951 | LT-952 | LT-953 | LT-954 | LT-955 | LT-956 | LT-957 | LT-958 | LT-959 | LT-960 | LT-961 | LT-962 | LT-963 | LT-964 | LT-965 | LT-966 | LT-967 | LT-968 | LT-969 | LT-970 | LT-971 | LT-972 | LT-973 | LT-974 | LT-975 | LT-976 | LT-977 | LT-978 | LT-979 | LT-980 | LT-981 | LT-982 | LT-983 | LT-984 | LT-985 | LT-986 | LT-987 | LT-988 | LT-989 | LT-990 | LT-991 | LT-992 | LT-993 | LT-994 | LT-995 | LT-996 | LT-997 | LT-998 | LT-999 | LT-1000 | LT-1001 | LT-1002 | LT-1003 | LT-1004 | LT-1005 | LT-1006 | LT-1007 | LT-1008 | LT-1009 | LT-1010 | LT-1011 | LT-1012 | LT-1013 | LT-1014 | LT-1015 | LT-1016 | LT-1017 | LT-1018 | LT-1019 | LT-1020 | LT-1021 | LT-1022 | LT-1023 | LT-1024 | LT-1025 | LT-1026 | LT-1027 | LT-1028 | LT-1029 | LT-1030 | LT-1031 | LT-1032 | LT-1033 | LT-1034 | LT-1035 | LT-1036 | LT-1037 | LT-1038 | LT-1039 | LT-1040 | LT-1041 | LT-1042 | LT-1043 | LT-1044 | LT-1045 | LT-1046 | LT-1047 | LT-1048 | LT-1049 | LT-1050 | LT-1051 | LT-1052 | LT-1053 | LT-1054 | LT-1055 | LT-1056 | LT-1057 | LT-1058 | LT-1059 | LT-1060 | LT-1061 | LT-1062 | LT-1063 | LT-1064 | LT-1065 | LT-1066 | LT-1067 | LT-1068 | LT-1069 | LT-1070 | LT-1071 | LT-1072 | LT-1073 | LT-1074 | LT-1075 | LT-1076 | LT-1077 | LT-1078 | LT-1079 | LT-1080 | LT-1081 | LT-1082 | LT-1083 | LT-1084 | LT-1085 | LT-1086 | LT-1087 | LT-1088 | LT-1089 | LT-1090 | LT-1091 | LT-1092 | LT-1093 | LT-1094 | LT-1095 | LT-1096 | LT-1097 | LT-1098 | LT-1099 | LT-1100 | LT-1101 | LT-1102 | LT-1103 | LT-1104 | LT-1105 | LT-1106 | LT-1107 | LT-1108 | LT-1109 | LT-1110 | LT-1111 | LT-1112 | LT-1113 | LT-1114 | LT-1115 | LT-1116 | LT-1117 | LT-1118 | LT-1119 | LT-1120 | LT-1121 | LT-1122 | LT-1123 | LT-1124 | LT-1125 | LT-1126 | LT-1127 | LT-1128 | LT-1129 | LT-1130 | LT-1131 | LT-1132 | LT-1133 | LT-1134 | LT-1135 | LT-1136 | LT-1137 | LT-1138 | LT-1139 | LT-1140 | LT-1141 | LT-1142 | LT-1143 | LT-1144 | LT-1145 | LT-1146 | LT-1147 | LT-1148 | LT-1149 | LT-1150 | LT-1151 | LT-1152 | LT-1153 | LT-1154 | LT-1155 | LT-1156 | LT-1157 | LT-1158 | LT-1159 | LT-1160 | LT-1161 | LT-1162 | LT-1163 | LT-1164 | LT-1165 | LT-1166 | LT-1167 | LT-1168 | LT-1169 | LT-1170 | LT-1171 | LT-1172 | LT-1173 | LT-1174 | LT-1175 | LT-1176 | LT-1177 | LT-1178 | LT-1179 | LT-1180 | LT-1181 | LT-1182 | LT-1183 | LT-1184 | LT-1185 | LT-1186 | LT-1187 | LT-1188 | LT-1189 | LT-1190 | LT-1191 | LT-1192 | LT-1193 | LT-1194 | LT-1195 | LT-1196 | LT-1197 | LT-1198 | LT-1199 | LT-1200 | LT-1201 | LT-1202 | LT-1203 | LT-1204 | LT-1205 | LT-1206 | LT-1207 | LT-1208 | LT-1209 | LT-1210 | LT-1211 | LT-1212 | LT-1213 | LT-1214 | LT-1215 | LT-1216 | LT-1217 | LT-1218 | LT-1219 | LT-1220 | LT-1221 | LT-1222 | LT-1223 | LT-12 |
|--|-----|-----|-----|-----|-----|-----|-----|------|-----|-----|------|------|-----|-----|-----|-------|-------|-------|-------|-------|-------|-------|-------|-------|-------|-------|-------|-------|-------|-------|-------|-------|-------|-------|-------|-------|-------|-------|-------|-------|-------|-------|-------|-------|-------|-------|-------|-------|-------|-------|-------|-------|-------|-------|-------|-------|-------|-------|-------|-------|-------|-------|-------|-------|-------|-------|-------|-------|-------|-------|-------|-------|-------|-------|-------|-------|-------|-------|-------|-------|-------|-------|-------|-------|-------|-------|-------|-------|-------|-------|-------|-------|-------|-------|-------|-------|-------|-------|-------|-------|-------|-------|--------|--------|--------|--------|--------|--------|--------|--------|--------|--------|--------|--------|--------|--------|--------|--------|--------|--------|--------|--------|--------|--------|--------|--------|--------|--------|--------|--------|--------|--------|--------|--------|--------|--------|--------|--------|--------|--------|--------|--------|--------|--------|--------|--------|--------|--------|--------|--------|--------|--------|--------|--------|--------|--------|--------|--------|--------|--------|--------|--------|--------|--------|--------|--------|--------|--------|--------|--------|--------|--------|--------|--------|--------|--------|--------|--------|--------|--------|--------|--------|--------|--------|--------|--------|--------|--------|--------|--------|--------|--------|--------|--------|--------|--------|--------|--------|--------|--------|--------|--------|--------|--------|--------|--------|--------|--------|--------|--------|--------|--------|--------|--------|--------|--------|--------|--------|--------|--------|--------|--------|--------|--------|--------|--------|--------|--------|--------|--------|--------|--------|--------|--------|--------|--------|--------|--------|--------|--------|--------|--------|--------|--------|--------|--------|--------|--------|--------|--------|--------|--------|--------|--------|--------|--------|--------|--------|--------|--------|--------|--------|--------|--------|--------|--------|--------|--------|--------|--------|--------|--------|--------|--------|--------|--------|--------|--------|--------|--------|--------|--------|--------|--------|--------|--------|--------|--------|--------|--------|--------|--------|--------|--------|--------|--------|--------|--------|--------|--------|--------|--------|--------|--------|--------|--------|--------|--------|--------|--------|--------|--------|--------|--------|--------|--------|--------|--------|--------|--------|--------|--------|--------|--------|--------|--------|--------|--------|--------|--------|--------|--------|--------|--------|--------|--------|--------|--------|--------|--------|--------|--------|--------|--------|--------|--------|--------|--------|--------|--------|--------|--------|--------|--------|--------|--------|--------|--------|--------|--------|--------|--------|--------|--------|--------|--------|--------|--------|--------|--------|--------|--------|--------|--------|--------|--------|--------|--------|--------|--------|--------|--------|--------|--------|--------|--------|--------|--------|--------|--------|--------|--------|--------|--------|--------|--------|--------|--------|--------|--------|--------|--------|--------|--------|--------|--------|--------|--------|--------|--------|--------|--------|--------|--------|--------|--------|--------|--------|--------|--------|--------|--------|--------|--------|--------|--------|--------|--------|--------|--------|--------|--------|--------|--------|--------|--------|--------|--------|--------|--------|--------|--------|--------|--------|--------|--------|--------|--------|--------|--------|--------|--------|--------|--------|--------|--------|--------|--------|--------|--------|--------|--------|--------|--------|--------|--------|--------|--------|--------|--------|--------|--------|--------|--------|--------|--------|--------|--------|--------|--------|--------|--------|--------|--------|--------|--------|--------|--------|--------|--------|--------|--------|--------|--------|--------|--------|--------|--------|--------|--------|--------|--------|--------|--------|--------|--------|--------|--------|--------|--------|--------|--------|--------|--------|--------|--------|--------|--------|--------|--------|--------|--------|--------|--------|--------|--------|--------|--------|--------|--------|--------|--------|--------|--------|--------|--------|--------|--------|--------|--------|--------|--------|--------|--------|--------|--------|--------|--------|--------|--------|--------|--------|--------|--------|--------|--------|--------|--------|--------|--------|--------|--------|--------|--------|--------|--------|--------|--------|--------|--------|--------|--------|--------|--------|--------|--------|--------|--------|--------|--------|--------|--------|--------|--------|--------|--------|--------|--------|--------|--------|--------|--------|--------|--------|--------|--------|--------|--------|--------|--------|--------|--------|--------|--------|--------|--------|--------|--------|--------|--------|--------|--------|--------|--------|--------|--------|--------|--------|--------|--------|--------|--------|--------|--------|--------|--------|--------|--------|--------|--------|--------|--------|--------|--------|--------|--------|--------|--------|--------|--------|--------|--------|--------|--------|--------|--------|--------|--------|--------|--------|--------|--------|--------|--------|--------|--------|--------|--------|--------|--------|--------|--------|--------|--------|--------|--------|--------|--------|--------|--------|--------|--------|--------|--------|--------|--------|--------|--------|--------|--------|--------|--------|--------|--------|--------|--------|--------|--------|--------|--------|--------|--------|--------|--------|--------|--------|--------|--------|--------|--------|--------|--------|--------|--------|--------|--------|--------|--------|--------|--------|--------|--------|--------|--------|--------|--------|--------|--------|--------|--------|--------|--------|--------|--------|--------|--------|--------|--------|--------|--------|--------|--------|--------|--------|--------|--------|--------|--------|--------|--------|--------|--------|--------|--------|--------|--------|--------|--------|--------|--------|--------|--------|--------|--------|--------|--------|--------|--------|--------|--------|--------|--------|--------|--------|--------|--------|--------|--------|--------|--------|--------|--------|--------|--------|--------|--------|--------|--------|--------|--------|--------|--------|--------|--------|--------|--------|--------|--------|--------|--------|--------|--------|--------|--------|--------|--------|--------|--------|--------|--------|--------|--------|--------|--------|--------|--------|--------|--------|--------|--------|--------|--------|--------|--------|--------|--------|--------|--------|--------|--------|--------|--------|--------|--------|--------|--------|--------|--------|--------|--------|--------|--------|--------|--------|--------|--------|--------|--------|--------|--------|--------|--------|--------|--------|--------|--------|--------|--------|--------|--------|--------|--------|--------|--------|--------|--------|--------|--------|--------|--------|--------|--------|--------|--------|--------|--------|--------|--------|--------|--------|--------|--------|--------|--------|--------|--------|--------|--------|--------|--------|--------|--------|--------|--------|--------|--------|--------|--------|--------|--------|--------|--------|--------|--------|--------|--------|--------|--------|--------|--------|--------|--------|--------|--------|--------|--------|--------|--------|--------|--------|--------|--------|--------|--------|--------|--------|--------|--------|--------|--------|--------|--------|--------|--------|--------|--------|--------|--------|--------|--------|--------|--------|--------|--------|--------|--------|--------|--------|--------|--------|--------|--------|--------|--------|--------|--------|--------|--------|--------|--------|--------|--------|--------|--------|--------|--------|--------|--------|--------|--------|--------|--------|--------|--------|--------|--------|--------|--------|--------|--------|--------|--------|--------|--------|--------|--------|--------|--------|--------|--------|--------|--------|--------|--------|--------|--------|--------|--------|--------|--------|--------|--------|--------|--------|--------|--------|--------|--------|--------|--------|--------|--------|---------|---------|---------|---------|---------|---------|---------|---------|---------|---------|---------|---------|---------|---------|---------|---------|---------|---------|---------|---------|---------|---------|---------|---------|---------|---------|---------|---------|---------|---------|---------|---------|---------|---------|---------|---------|---------|---------|---------|---------|---------|---------|---------|---------|---------|---------|---------|---------|---------|---------|---------|---------|---------|---------|---------|---------|---------|---------|---------|---------|---------|---------|---------|---------|---------|---------|---------|---------|---------|---------|---------|---------|---------|---------|---------|---------|---------|---------|---------|---------|---------|---------|---------|---------|---------|---------|---------|---------|---------|---------|---------|---------|---------|---------|---------|---------|---------|---------|---------|---------|---------|---------|---------|---------|---------|---------|---------|---------|---------|---------|---------|---------|---------|---------|---------|---------|---------|---------|---------|---------|---------|---------|---------|---------|---------|---------|---------|---------|---------|---------|---------|---------|---------|---------|---------|---------|---------|---------|---------|---------|---------|---------|---------|---------|---------|---------|---------|---------|---------|---------|---------|---------|---------|---------|---------|---------|---------|---------|---------|---------|---------|---------|---------|---------|---------|---------|---------|---------|---------|---------|---------|---------|---------|---------|---------|---------|---------|---------|---------|---------|---------|---------|---------|---------|---------|---------|---------|---------|---------|---------|---------|---------|---------|---------|---------|---------|---------|---------|---------|---------|---------|---------|---------|---------|---------|---------|---------|---------|---------|---------|---------|---------|---------|---------|---------|---------|---------|---------|---------|---------|---------|---------|---------|---------|-------|
|--|-----|-----|-----|-----|-----|-----|-----|------|-----|-----|------|------|-----|-----|-----|-------|-------|-------|-------|-------|-------|-------|-------|-------|-------|-------|-------|-------|-------|-------|-------|-------|-------|-------|-------|-------|-------|-------|-------|-------|-------|-------|-------|-------|-------|-------|-------|-------|-------|-------|-------|-------|-------|-------|-------|-------|-------|-------|-------|-------|-------|-------|-------|-------|-------|-------|-------|-------|-------|-------|-------|-------|-------|-------|-------|-------|-------|-------|-------|-------|-------|-------|-------|-------|-------|-------|-------|-------|-------|-------|-------|-------|-------|-------|-------|-------|-------|-------|-------|-------|-------|-------|--------|--------|--------|--------|--------|--------|--------|--------|--------|--------|--------|--------|--------|--------|--------|--------|--------|--------|--------|--------|--------|--------|--------|--------|--------|--------|--------|--------|--------|--------|--------|--------|--------|--------|--------|--------|--------|--------|--------|--------|--------|--------|--------|--------|--------|--------|--------|--------|--------|--------|--------|--------|--------|--------|--------|--------|--------|--------|--------|--------|--------|--------|--------|--------|--------|--------|--------|--------|--------|--------|--------|--------|--------|--------|--------|--------|--------|--------|--------|--------|--------|--------|--------|--------|--------|--------|--------|--------|--------|--------|--------|--------|--------|--------|--------|--------|--------|--------|--------|--------|--------|--------|--------|--------|--------|--------|--------|--------|--------|--------|--------|--------|--------|--------|--------|--------|--------|--------|--------|--------|--------|--------|--------|--------|--------|--------|--------|--------|--------|--------|--------|--------|--------|--------|--------|--------|--------|--------|--------|--------|--------|--------|--------|--------|--------|--------|--------|--------|--------|--------|--------|--------|--------|--------|--------|--------|--------|--------|--------|--------|--------|--------|--------|--------|--------|--------|--------|--------|--------|--------|--------|--------|--------|--------|--------|--------|--------|--------|--------|--------|--------|--------|--------|--------|--------|--------|--------|--------|--------|--------|--------|--------|--------|--------|--------|--------|--------|--------|--------|--------|--------|--------|--------|--------|--------|--------|--------|--------|--------|--------|--------|--------|--------|--------|--------|--------|--------|--------|--------|--------|--------|--------|--------|--------|--------|--------|--------|--------|--------|--------|--------|--------|--------|--------|--------|--------|--------|--------|--------|--------|--------|--------|--------|--------|--------|--------|--------|--------|--------|--------|--------|--------|--------|--------|--------|--------|--------|--------|--------|--------|--------|--------|--------|--------|--------|--------|--------|--------|--------|--------|--------|--------|--------|--------|--------|--------|--------|--------|--------|--------|--------|--------|--------|--------|--------|--------|--------|--------|--------|--------|--------|--------|--------|--------|--------|--------|--------|--------|--------|--------|--------|--------|--------|--------|--------|--------|--------|--------|--------|--------|--------|--------|--------|--------|--------|--------|--------|--------|--------|--------|--------|--------|--------|--------|--------|--------|--------|--------|--------|--------|--------|--------|--------|--------|--------|--------|--------|--------|--------|--------|--------|--------|--------|--------|--------|--------|--------|--------|--------|--------|--------|--------|--------|--------|--------|--------|--------|--------|--------|--------|--------|--------|--------|--------|--------|--------|--------|--------|--------|--------|--------|--------|--------|--------|--------|--------|--------|--------|--------|--------|--------|--------|--------|--------|--------|--------|--------|--------|--------|--------|--------|--------|--------|--------|--------|--------|--------|--------|--------|--------|--------|--------|--------|--------|--------|--------|--------|--------|--------|--------|--------|--------|--------|--------|--------|--------|--------|--------|--------|--------|--------|--------|--------|--------|--------|--------|--------|--------|--------|--------|--------|--------|--------|--------|--------|--------|--------|--------|--------|--------|--------|--------|--------|--------|--------|--------|--------|--------|--------|--------|--------|--------|--------|--------|--------|--------|--------|--------|--------|--------|--------|--------|--------|--------|--------|--------|--------|--------|--------|--------|--------|--------|--------|--------|--------|--------|--------|--------|--------|--------|--------|--------|--------|--------|--------|--------|--------|--------|--------|--------|--------|--------|--------|--------|--------|--------|--------|--------|--------|--------|--------|--------|--------|--------|--------|--------|--------|--------|--------|--------|--------|--------|--------|--------|--------|--------|--------|--------|--------|--------|--------|--------|--------|--------|--------|--------|--------|--------|--------|--------|--------|--------|--------|--------|--------|--------|--------|--------|--------|--------|--------|--------|--------|--------|--------|--------|--------|--------|--------|--------|--------|--------|--------|--------|--------|--------|--------|--------|--------|--------|--------|--------|--------|--------|--------|--------|--------|--------|--------|--------|--------|--------|--------|--------|--------|--------|--------|--------|--------|--------|--------|--------|--------|--------|--------|--------|--------|--------|--------|--------|--------|--------|--------|--------|--------|--------|--------|--------|--------|--------|--------|--------|--------|--------|--------|--------|--------|--------|--------|--------|--------|--------|--------|--------|--------|--------|--------|--------|--------|--------|--------|--------|--------|--------|--------|--------|--------|--------|--------|--------|--------|--------|--------|--------|--------|--------|--------|--------|--------|--------|--------|--------|--------|--------|--------|--------|--------|--------|--------|--------|--------|--------|--------|--------|--------|--------|--------|--------|--------|--------|--------|--------|--------|--------|--------|--------|--------|--------|--------|--------|--------|--------|--------|--------|--------|--------|--------|--------|--------|--------|--------|--------|--------|--------|--------|--------|--------|--------|--------|--------|--------|--------|--------|--------|--------|--------|--------|--------|--------|--------|--------|--------|--------|--------|--------|--------|--------|--------|--------|--------|--------|--------|--------|--------|--------|--------|--------|--------|--------|--------|--------|--------|--------|--------|--------|--------|--------|--------|--------|--------|--------|--------|--------|--------|--------|--------|--------|--------|--------|--------|--------|--------|--------|--------|--------|--------|--------|--------|--------|--------|--------|--------|--------|--------|--------|--------|--------|--------|--------|--------|--------|--------|--------|--------|--------|--------|--------|--------|--------|--------|--------|--------|--------|--------|--------|--------|--------|--------|--------|--------|--------|--------|--------|--------|--------|--------|--------|--------|--------|--------|--------|--------|--------|--------|--------|--------|--------|--------|--------|--------|--------|--------|--------|--------|--------|--------|--------|--------|--------|--------|--------|--------|--------|--------|--------|--------|--------|--------|--------|--------|--------|--------|--------|--------|--------|--------|--------|--------|--------|--------|--------|--------|--------|--------|--------|--------|--------|--------|--------|--------|--------|--------|--------|--------|--------|--------|--------|--------|--------|--------|--------|--------|--------|--------|--------|--------|--------|--------|--------|--------|--------|--------|--------|--------|--------|--------|--------|--------|--------|--------|--------|--------|--------|--------|--------|--------|--------|--------|--------|--------|--------|--------|--------|--------|--------|--------|--------|--------|--------|--------|--------|--------|--------|--------|--------|--------|--------|--------|--------|--------|---------|---------|---------|---------|---------|---------|---------|---------|---------|---------|---------|---------|---------|---------|---------|---------|---------|---------|---------|---------|---------|---------|---------|---------|---------|---------|---------|---------|---------|---------|---------|---------|---------|---------|---------|---------|---------|---------|---------|---------|---------|---------|---------|---------|---------|---------|---------|---------|---------|---------|---------|---------|---------|---------|---------|---------|---------|---------|---------|---------|---------|---------|---------|---------|---------|---------|---------|---------|---------|---------|---------|---------|---------|---------|---------|---------|---------|---------|---------|---------|---------|---------|---------|---------|---------|---------|---------|---------|---------|---------|---------|---------|---------|---------|---------|---------|---------|---------|---------|---------|---------|---------|---------|---------|---------|---------|---------|---------|---------|---------|---------|---------|---------|---------|---------|---------|---------|---------|---------|---------|---------|---------|---------|---------|---------|---------|---------|---------|---------|---------|---------|---------|---------|---------|---------|---------|---------|---------|---------|---------|---------|---------|---------|---------|---------|---------|---------|---------|---------|---------|---------|---------|---------|---------|---------|---------|---------|---------|---------|---------|---------|---------|---------|---------|---------|---------|---------|---------|---------|---------|---------|---------|---------|---------|---------|---------|---------|---------|---------|---------|---------|---------|---------|---------|---------|---------|---------|---------|---------|---------|---------|---------|---------|---------|---------|---------|---------|---------|---------|---------|---------|---------|---------|---------|---------|---------|---------|---------|---------|---------|---------|---------|---------|---------|---------|---------|---------|---------|---------|---------|---------|---------|---------|---------|-------|
